# Supplementary material for: Heterodinuclear MII–LnIII single molecule magnets constructed from exchange-coupled single ion magnets
Source: Royal Society of Chemistry journal article supplement (doi:10.1039/c4dt00740a), 2014-01-01
Supplement: c4dt00740a1.pdf [file c4dt00740a1.pdf]

## Electronic Supplementary Information

### Heterodinuclear $M^{II}$ - $Ln^{III}$ single molecule magnets constructed from exchange-coupled single ion magnets

Qi-Wei Xie<sup>a</sup>, Shu-Qi Wu<sup>a</sup>, Wen-Bo Shi<sup>a</sup>, Cai-Ming Liu<sup>b</sup>, Ai-Li Cui<sup>a</sup>  
and Hui-Zhong Kou,<sup>†a</sup>

<sup>† a</sup> *Department of Chemistry, Tsinghua University, Beijing 100084, P. R. China.*

E-mail: [kouhz@mail.tsinghua.edu.cn](mailto:kouhz@mail.tsinghua.edu.cn).

<sup>b</sup> *Beijing National Laboratory for Molecular Sciences, Center for Molecular Science,  
Institute of Chemistry, Chinese Academy of Sciences, Beijing 100190, P. R. China.*

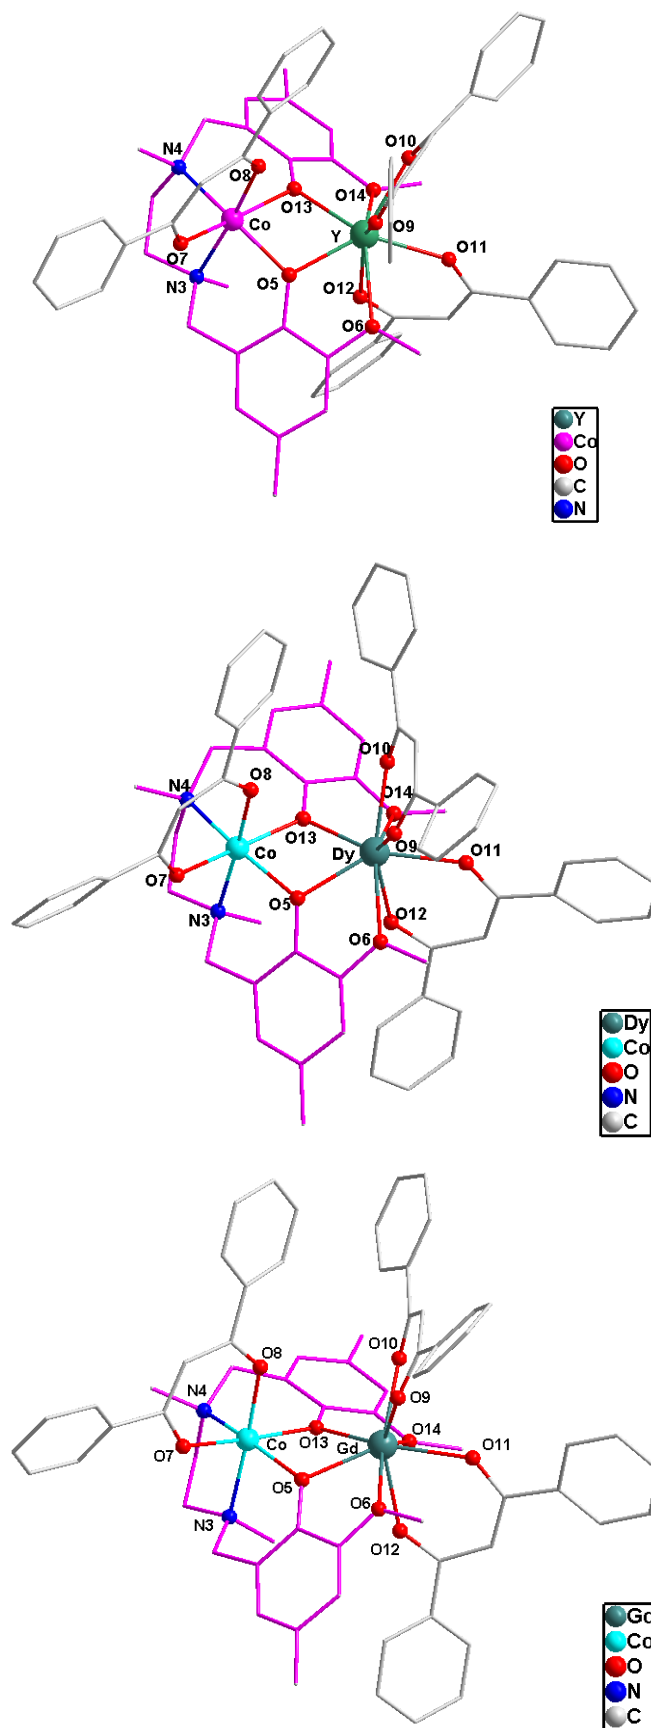

Fig. S1. Crystal structure of complexes 2-4.

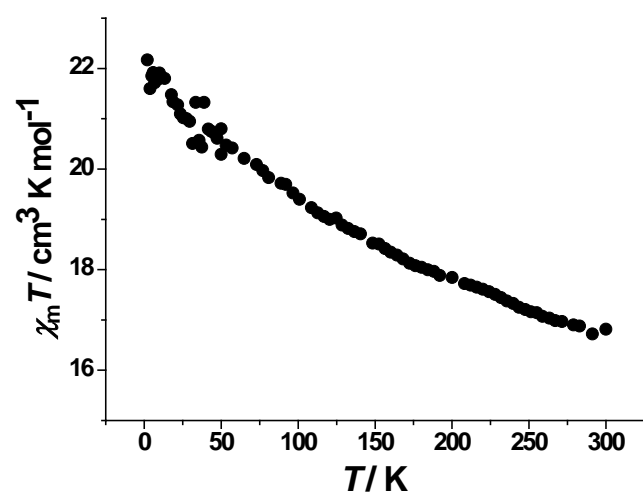

**Fig. S2.** Temperature dependence of  $\chi_m T$  per  $\text{Zn}^{\text{II}}\text{Dy}^{\text{III}}$  unit for a diluted sample  $\text{ZnDy}_{0.0885}\text{Y}_{0.9115}$  (Dy:Y = 1:10.3 determined by ICP analysis) of complex **1**.

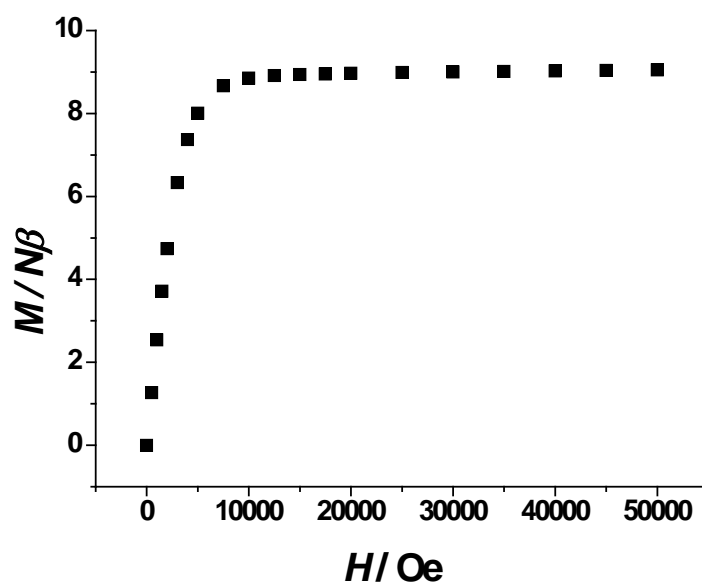

**Fig. S3.** Field dependence of magnetization for complex **1** at 2.0 K.

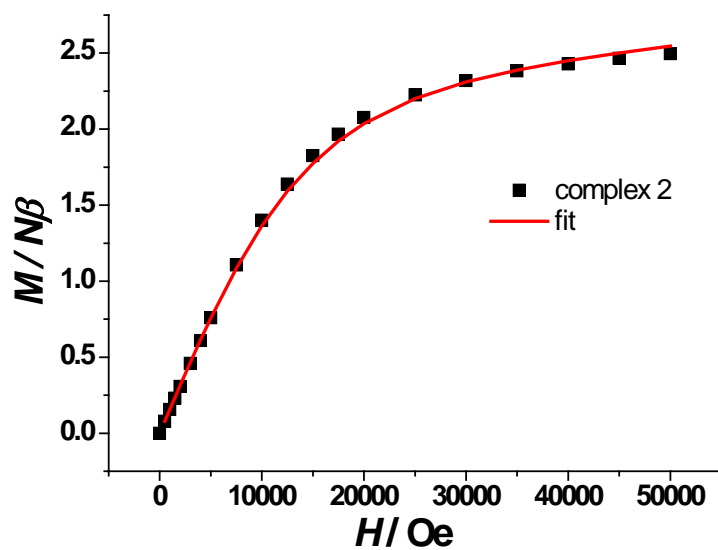

**Fig. S4.** Field dependence of magnetization for complex 2 at 2.0 K. The red line is the best fitting result with  $g = 2.39$ ,  $D = 10.3 \text{ cm}^{-1}$  and  $E = 4 \times 10^{-4} \text{ cm}^{-1}$ .

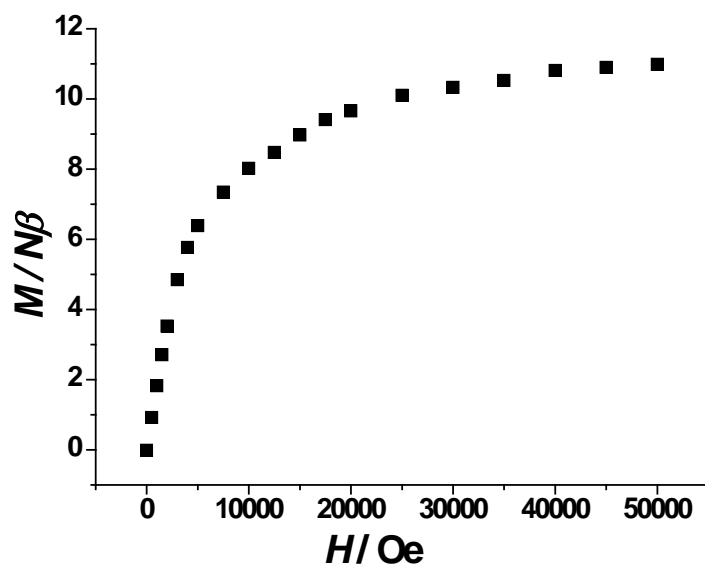

**Fig. S5.** Field dependence of magnetization for complex 3 at 2.0 K.

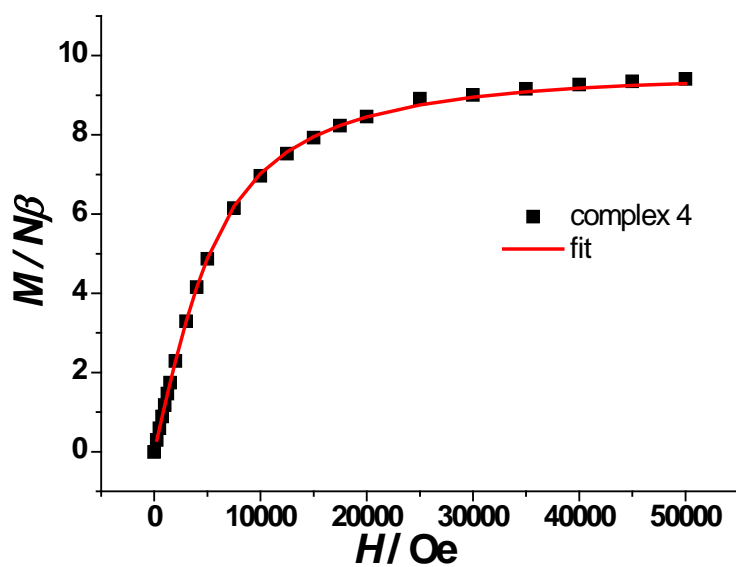

**Fig. S6.** Field dependence of magnetization for complex 4 at 2.0 K. The red line is the best fitting result with  $g = 1.89$  and  $D = 0.17 \text{ cm}^{-1}$ .

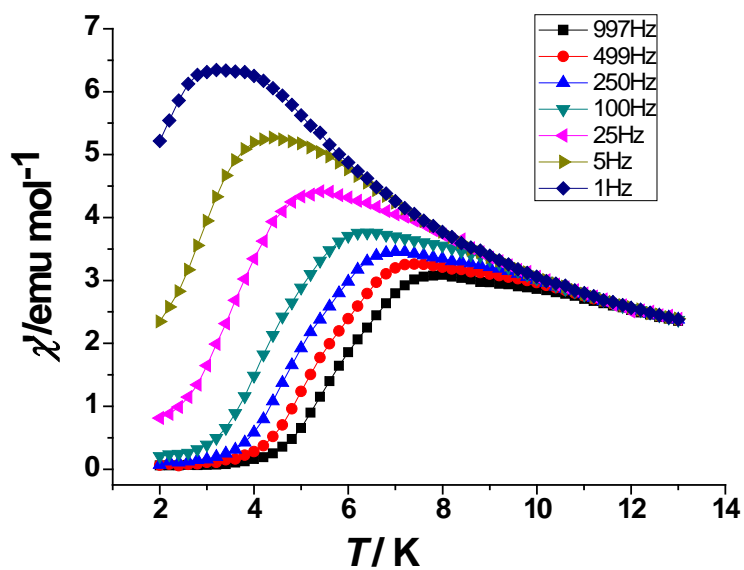

**Fig. S7.** Temperature dependence of in-phase magnetic susceptibility of complex 1 under 2 kOe dc field.

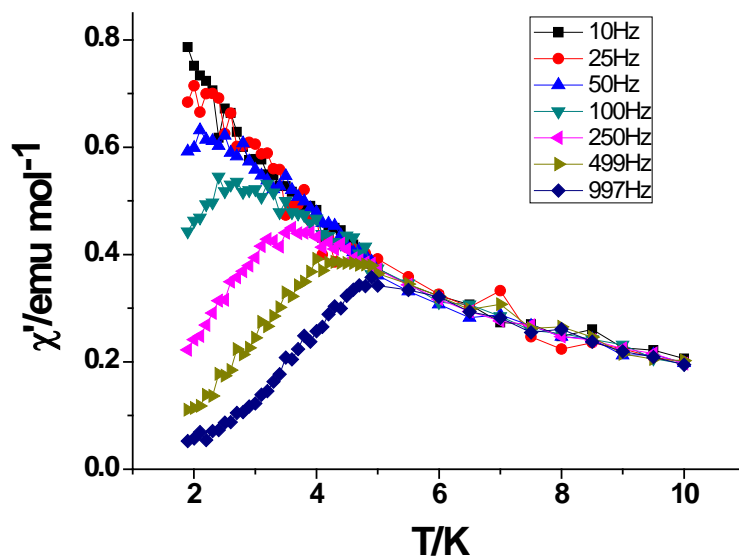

**Fig. S8.** Temperature dependence of in-phase magnetic susceptibility of complex **2** under 2 kOe dc field.

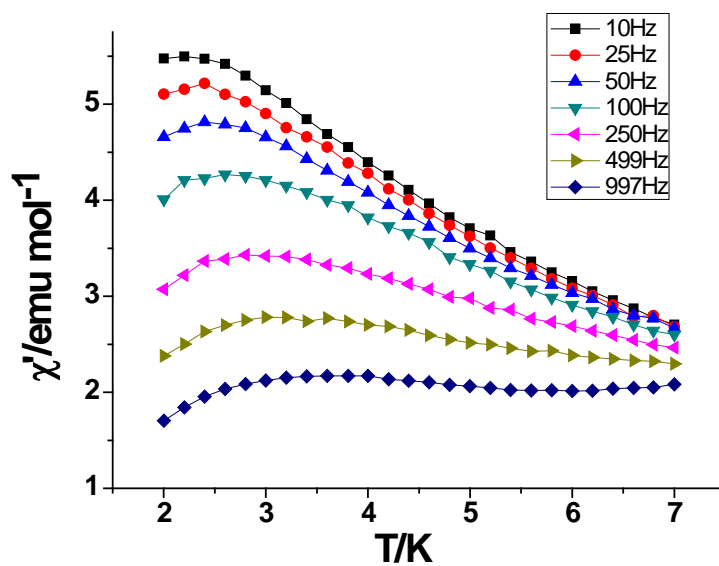

**Fig. S9.** Temperature dependence of in-phase magnetic susceptibility of complex **3** under 2 kOe dc field.

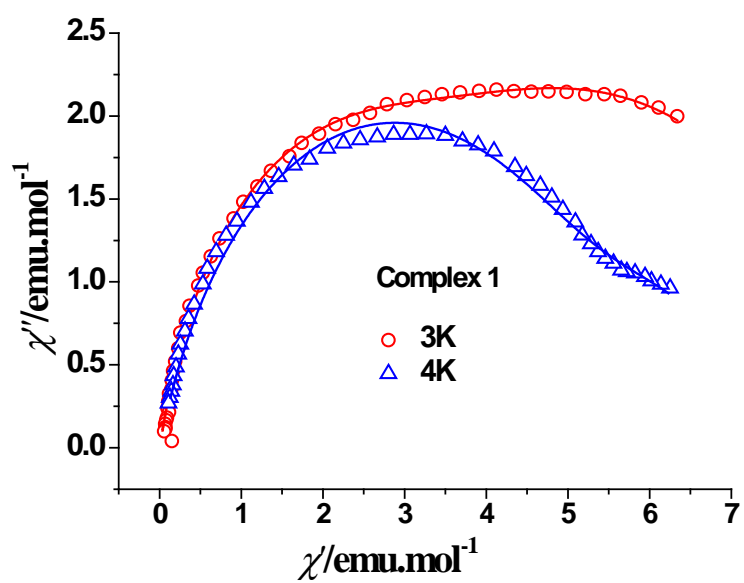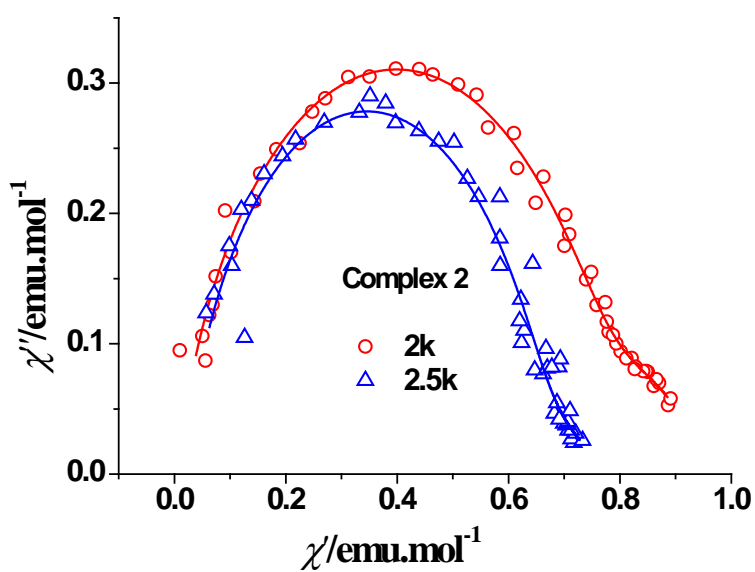

**Fig. S10.** Cole-Cole plots in 2 kOe applied dc filed for complexes **1** (top) and **2** (bottom). The solid lines represent the best fit by using the parameters in Tables S1 and S2, respectively.

**Table S1.** Relaxation Fitting Parameters from Least-Squares Fitting of  $\chi(\omega)$  data for Complex 1

| $T$ (K) | $\chi_s$ | $\chi_t$ | $\beta$ | $\alpha_1$ | $\tau_1$ | $\alpha_2$ | $\tau_2$ |
|---------|----------|----------|---------|------------|----------|------------|----------|
| 3       | 8.05E-17 | 8.82     | 0.30    | 0.11       | 0.048    | 0.31       | 0.64     |
| 4       | 6.92E-18 | 7.53     | 0.33    | 0.36       | 0.91     | 0.22       | 0.024    |

**Table S2.** Relaxation Fitting Parameters from Least-Squares Fitting of  $\chi(\omega)$  data for Complex 2

| $T$ (K) | $\chi_s$ | $\chi_t$ | $\beta$ | $\alpha_1$ | $\tau_1$ | $\alpha_2$ | $\tau_2$ |
|---------|----------|----------|---------|------------|----------|------------|----------|
| 2       | 0.0049   | 0.95     | 0.79    | 0.14       | 0.0072   | 0.38       | 0.40     |
| 2.5     | 2.32E-16 | 0.77     | 0.71    | 0.059      | 0.0041   | 0.62       | 0.034    |

The corresponding expression of molar magnetic susceptibility for complex 4 is given in Eq. (S1).

$$\hat{H} = -2J_{\text{CoGd}} \hat{S}_{\text{Gd}} \hat{S}_{\text{Co}}$$

$$\chi_m = \frac{N\beta^2}{3k(T-\theta)} \cdot \frac{330g_{(5)}^2 \exp(24x) + 180g_{(4)}^2 \exp(14x) + 84g_{(3)}^2 \exp(6x) + 30g_{(2)}^2}{11\exp(24x) + 9\exp(14x) + 7\exp(6x) + 5} \quad (\text{S1})$$

$$x = J_{\text{CoGd}} / kT,$$

$$g_{(5)} = \frac{7}{10} g_{\text{Gd}} + \frac{3}{10} g_{\text{Co}},$$

$$g_{(4)} = \frac{8}{10} g_{\text{Gd}} + \frac{2}{10} g_{\text{Co}},$$

$$g_{(3)} = g_{\text{Gd}},$$

$$g_{(2)} = \frac{3}{2} g_{\text{Gd}} - \frac{1}{2} g_{\text{Co}}$$
